# Supplementary material for: Assessment of the Effects of Triticonazole on Soil and Human Health
Source: MDPI journal article supplement (doi:10.3390/molecules27196554), 2022-10-03

Figure S1

Illustration of the hydrophilicity of the active site of the alkaline phosphatase from *Bacillus subtilis* (shown as hydrophobicity surface with blue region being hydrophilic and orange regions being hydrophobic) and the C-terminal helix (red cartoon) lying over the active site and controlling the access to this site.

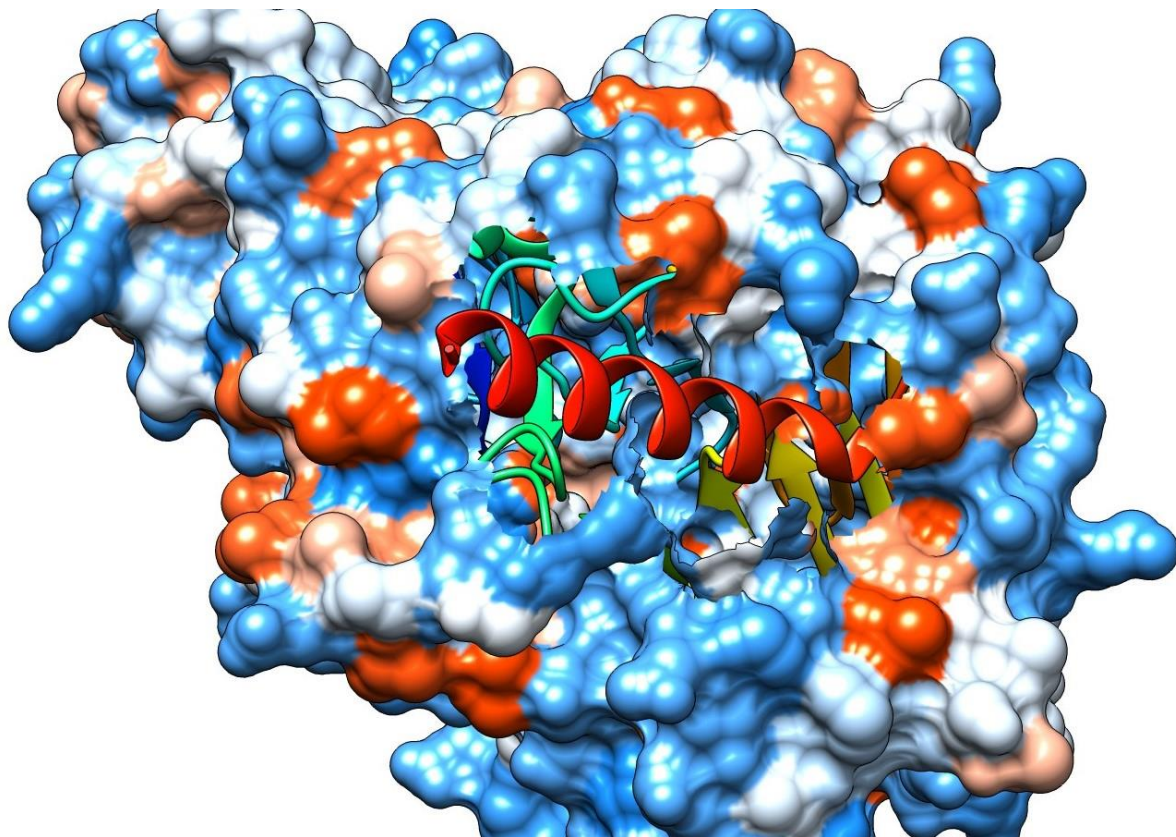

Supplement: s1 [file s1]
