# Supplementary material for: Assessment of the Effects of Triticonazole on Soil and Human Health
Source: MDPI journal article supplement (doi:10.3390/molecules27196554), 2022-10-03
Supplement: s1 [file s1]

Table S1. The structural files and the chain that were considered for molecular docking study

| Protein                                                                                       | PDB ID                     | Short characterization of the structural file                                                                                                                                                                              |
|-----------------------------------------------------------------------------------------------|----------------------------|----------------------------------------------------------------------------------------------------------------------------------------------------------------------------------------------------------------------------|
| <i>soil enzymes</i>                                                                           |                            |                                                                                                                                                                                                                            |
| dehydrogenases                                                                                | 1KEV, chains A, B, C, D    | Crystallographic structure of <i>Clostridium beijerinckii</i> NADP-dependent alcohol dehydrogenase in complex with dihydro-nicotinamide-adenine-dinucleotide phosphate (NADP) at a resolution of 2.05 Å [48].              |
|                                                                                               | 3AUT chains A and B        | Crystallographic structure of <i>Bacillus megaterium</i> glucose dehydrogenase 4 in complex with 1,4-dihydronicotinamide adenine dinucleotide at a resolution of 2.00 Å [49]. Only the B chain contains the ligand.        |
|                                                                                               | 3NT5 chains A and B        | Crystallographic structure of <i>Bacillus subtilis</i> myo-inositol dehydrogenase in complex with nicotinamide-adenine-dinucleotide and inositol at a resolution of 2.90 Å [50].                                           |
|                                                                                               | 5GTL chains A, B, C, and D | Crystallographic structure of aldehyde dehydrogenase from <i>Bacillus cereus</i> in complex with dihydro-nicotinamide-adenine-dinucleotide phosphate at a resolution of 2.90 Å (not published yet).                        |
| urease                                                                                        | 4AC7 chain C               | The crystal structure of <i>Bacillus pasteurii</i> urease in complex with the inhibitor citrate at a resolution of 1.50 Å [51]. Only the C chain has been considered as it contains the catalytic domain of urease.        |
| phosphatases                                                                                  | 1H2F chain A               | Crystallographic structure of the <i>Bacillus stearothermophilus</i> phosphatase PhoE in complex with trivanadate at a resolution of 2.00 Å [52].                                                                          |
|                                                                                               | 1QFX chains A and B        | Crystallographic structure of the acid phosphatase from <i>Aspergillus niger</i> in complex with 2-acetamido-2-deoxy-beta-D-glucopyranose at a resolution of 2.40 Å [53].                                                  |
|                                                                                               | 2YEQ chains A and B        | Crystallographic structure of alkaline phosphatase from <i>Bacillus subtilis</i> in complex with 3,6,9,12,15,18,21,24-octaoxahexacosan-1-ol at a resolution of 1.98 Å and an active site containing iron and calcium [54]. |
| <i>proteins that are important for assessing the effects of chemicals on the human health</i> |                            |                                                                                                                                                                                                                            |
| alpha-1 acid glycoprotein                                                                     | 3KQ0 chain A               | Crystallographic structure of human alpha1-acid glycoprotein in complex with (2R)-2,3-dihydroxypropyl acetate at a resolution of 1.80 Å [55].                                                                              |
| human serum albumin                                                                           | 4Z69 chains A and I        | Crystallographic structure of human serum albumin complexed with palmitic acid and diclofenac at a resolution of 2.19 Å [56].                                                                                              |
| cytochrome 1A2                                                                                | 2HI4 chain A               | Crystallographic structure of human cytochrome 1A2 in complex with alpha-naphthoflavone at a resolution of 1.95 Å [57].                                                                                                    |
| cytochrome 2C9                                                                                | 1OG5 chains A and B        | Crystallographic structure of human cytochrome 2C9 in complex with S-warfarin at a resolution of 2.55 Å [58].                                                                                                              |
| cytochrome 2C19                                                                               | 4GQS chains                | Crystallographic structure of human cytochrome 2C19 in complex with (4-hydroxy-3,5-dimethylphenyl)(2-methyl-1-benzofuran-3-yl)methanone at a resolution of 2.87 Å [59].                                                    |

|                   |                  |                                                                                                                  |
|-------------------|------------------|------------------------------------------------------------------------------------------------------------------|
|                   | A, B, C<br>and D |                                                                                                                  |
| cytochrome<br>2D6 | 4WNV<br>chain A  | Crystallographic structure of human cytochrome 2D6 in complex with<br>quinine at a resolution of 2.35 Å [60].    |
| cytochrome<br>3A4 | 1W0G<br>chain A  | Crystallographic structure of human cytochrome 2D6 in complex with<br>metyrapone at a resolution of 2.35 Å [61]. |
