# Supplementary material for: Assessment of the Effects of Triticonazole on Soil and Human Health
Source: MDPI journal article supplement (doi:10.3390/molecules27196554), 2022-10-03

Figure S2

Illustration of the hydrophilicity of the active site of the acid phosphatase from *Aspergillus niger*. The protein is shown as hydrophobicity surface with blue region being hydrophilic and orange regions being hydrophobic.

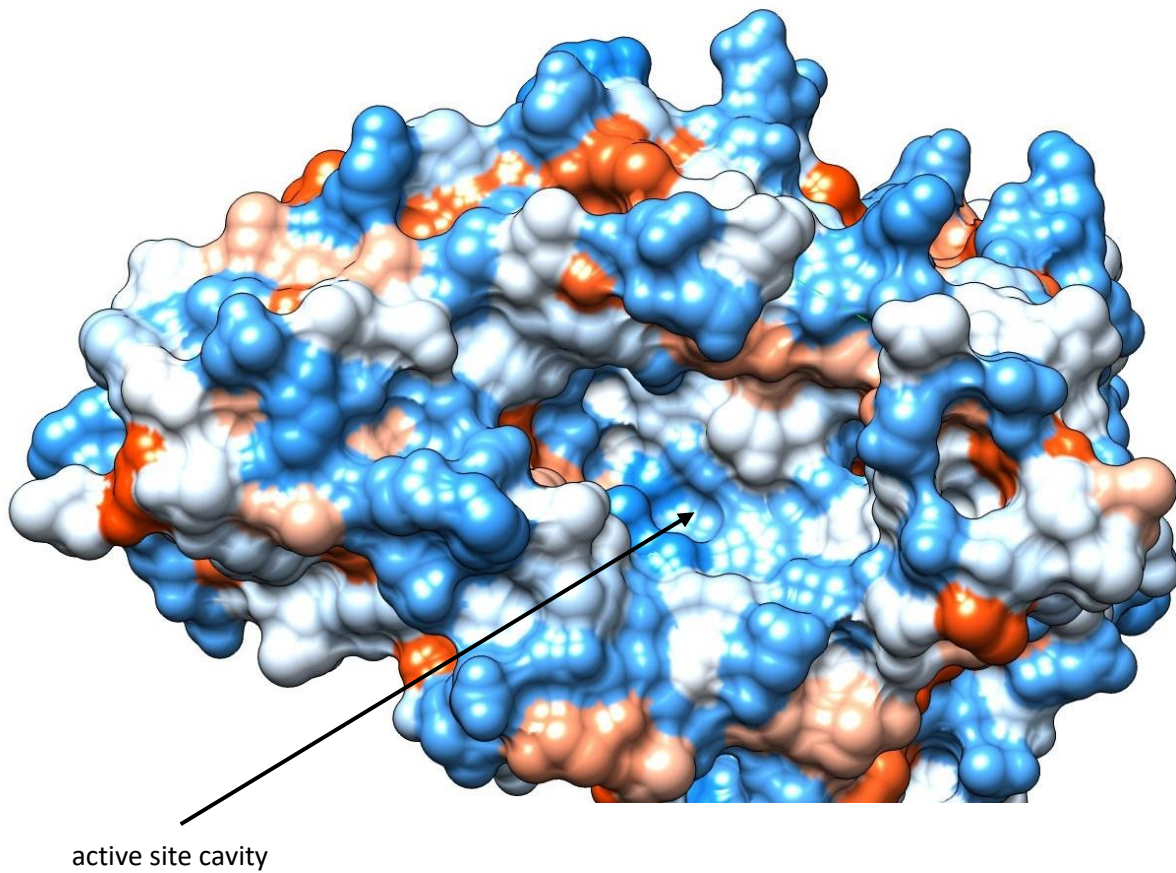

Supplement: s1 [file s1]
