# Supplementary material for: Assessment of the Effects of Triticonazole on Soil and Human Health
Source: MDPI journal article supplement (doi:10.3390/molecules27196554), 2022-10-03
Supplement: s1 [file s1]

Table S3. Noncovalent interactions between enantiomers of triticonazole (TTZ) and human cytochromes and plasma proteins, respectively. In parenthesis is given the number of the noncovalent interactions when it is higher than 1. For comparative purposes, this table also contains the noncovalent interactions between the investigated proteins and the ligands that are present in their crystallographic structures: BFH - 2-phenyl-4h-benzo[h]chromen-4-one, OXV - (4-hydroxy-3,5-dimethylphenyl)(2-methyl-1-benzofuran-3-yl)methanone, SWF - S-warfarin, Q19 – quinine, MYT – metyrapone, (2R)-2,3-dihydroxypropyl acetate (JIM) for alpha-1-acid glycoprotein, and diclofenac (DIF) for human serum albumin.

| Stereoisomer   | Protein and types of interactions                                                               |                                         |                   |                   |
|----------------|-------------------------------------------------------------------------------------------------|-----------------------------------------|-------------------|-------------------|
| HSA CHAIN A    |                                                                                                 |                                         |                   |                   |
|                | Hydrophobic                                                                                     | Hydrogen bonds                          | $\pi$ -staking    | Salt Bridges      |
| (R)-TTZ        | ARG218, ARG222, LEU238, LEU 260<br>ILE290, ALA291                                               | ARG275(2)                               | -                 | -                 |
| (S)-TTZ        | LEU260, ILE290, ALA291                                                                          | ARG218                                  | -                 | -                 |
| DIF 1007       | ARG218, LEU219, LEU260                                                                          | -                                       | -                 | LYS199,<br>ARG218 |
| HSA CHAIN I    |                                                                                                 |                                         |                   |                   |
| (R)-TTZ        | ILE264, ALA291,                                                                                 | ARG218(2)                               | LYS199            | -                 |
| (S)-TTZ        | TRP2014, LEU219, LEU238(2), LEU260,<br>ALA261, ALA291                                           | LYS199, ARG218,<br>ARG222, ALA291       | LYS199            | -                 |
| DIF 1006       | ARG222, PHE223, LEU260                                                                          | LYS199, ARG218                          | -                 | -                 |
| AGP CHAIN A    |                                                                                                 |                                         |                   |                   |
| (R)-TTZ        | TYR27(2), ARG90, PHE114                                                                         | GLN66                                   | -                 | -                 |
| (S)-TTZ        | TYR27(2), THR47, ILE88, AREG90,<br>ALA99, LEU112, PHE114                                        | GLN66, ARG90                            | -                 | -                 |
| JIM            | ARG90, PHE114                                                                                   | ARG90                                   | -                 | -                 |
| CYP1A2 CHAIN A |                                                                                                 |                                         |                   |                   |
| (R)-TTZ        | THR124, PHE226, ALA317, THR321,<br>LEU382, ILE386, LEU497, THR498                               | ARG108(2), ILE386,<br>PHE451(2), ARG456 | -                 | -                 |
| (S)-TTZ        | THR124, PHE226, VAL227, ALA317,<br>ASP320, THR321, LEU382, ILE386(2),<br>LEU497                 | ARG137, ILE459                          | -                 |                   |
| BHF            | THR118, PHE125, PHE226, PHE260(2),<br>ALA317, ASP320, THR321, LEU382,<br>ILE386, LEU497, THR498 | -                                       | PHE226            | --                |
| CYP2C9 CHAIN A |                                                                                                 |                                         |                   |                   |
| (R)-TTZ        | LEU208 (2), LEU233, PHE476                                                                      | -                                       | PHE114            | -                 |
| (S)-TTZ        | PHE100, ALA103, ILE205, LEU208,<br>ILE213, PHE476, ALA477                                       | -                                       | -                 | -                 |
| SWF            | ARG97, PHE100(2), VAL113, LEU208,<br>LEU366(2), PRO367, LEU388, PHE476                          | PHE100, ALA103,<br>ASN217               | PHE114,<br>PHE476 |                   |
| CYP2C9 CHAIN B |                                                                                                 |                                         |                   |                   |
| (R)-TTZ        | ALA103, VAL113, PHE114, LEU208,<br>LEU366                                                       | THR364(2)                               | -                 | -                 |
| (S)-TTZ        | ARG97, ILE99, PHE114(2), LEU208,<br>LEU366, PHE476                                              | GLN214, ASN217                          | -                 | -                 |
| SWF            | ARG97, PHE100(3), LEU102, VAL103,<br>LEU366 (2), PRO367, LEU388, PHE476                         | PHE100, LEU102,<br>ALA103, ASN217       | PHE114,<br>PHE476 | -                 |

| CYP2C19 CHAIN A |                                                                                           |                                    |   |                                   |
|-----------------|-------------------------------------------------------------------------------------------|------------------------------------|---|-----------------------------------|
| (R)-TTZ         | VAL113, PHE114, LEU233, ALA297, PHE476                                                    | ASN204                             | - | -                                 |
| (S)-TTZ         | VAL113, PHE114, ILE205, VAL208, ALA297, THR301, LEU366                                    | -                                  | - | -                                 |
| OXV             | VAL113(2), PHE114, ILE205, VAL208, GLU300 (2), THR301, ILE362, LEU366, PHE 476(2), ALA477 | -                                  | - | -                                 |
| CYP2C19 CHAIN B |                                                                                           |                                    |   |                                   |
| (R)-TTZ         | THR301, LEU361, ILE362(2), LEU366, PHE428                                                 | -                                  | - | -                                 |
| (S)-TTZ         | ILE205, GLU300, THR301, LEU366 (2), PHE476 (2)                                            | ARG97, ARG433, ILE434, VAL436      | - | -                                 |
| OXV             | VAL113, ILE205, ALA297, GLU300, THR301, LEU366, PHE 476(2), ALA477                        |                                    | - | -                                 |
| CYP2C19 CHAIN C |                                                                                           |                                    |   |                                   |
| (R)-TTZ         | VAL113, ALA297, ILE362, LEU366, PHE476                                                    | -                                  | - | -                                 |
| (S)-TTZ         | ALA297, LEU366, PHE428                                                                    | -                                  | - | -                                 |
| OXV             | VAL113, PHE114, ILE205, VAL208, GLU300, THR301, LEU366, PHE476                            | -                                  | - | -                                 |
| CYP2C19 CHAIN D |                                                                                           |                                    |   |                                   |
| (R)-TTZ         | PHE114, ILE205, LEU237, THR301, PHE476(2)                                                 | -                                  | - | -                                 |
| (S)-TTZ         | ALA103, PHE114, ILE205, LEU237, THR301, LEU366                                            | ALA297                             | - | -                                 |
| OXV             | PHE114, ILE205, ALA297, GLU300, THR301, ILE362, LEU366, PHE476 (2), ALA477                | -                                  | - | -                                 |
| CYP3A4 CHAIN A  |                                                                                           |                                    |   |                                   |
| (R)-TTZ         | PHE108, PHE304                                                                            | ARG105, SER119                     | - |                                   |
| (S)-TTZ         | ILE301(2), PHE304, ALA305, ILE369, ILE443                                                 | -                                  | - | -                                 |
| MYT             | ILE118, PHE137, ILE301(2), PHE302, PHE304, ALA305, THR309, LEU373, PHE435, ILE443         | ARG 105(2), ARG130, ARG375, ARG440 | - | ARG105(2), ARG130, ARG375, ARG440 |
