# Supplementary material for: Assessment of the Effects of Triticonazole on Soil and Human Health
Source: MDPI journal article supplement (doi:10.3390/molecules27196554), 2022-10-03
Supplement: s1 [file s1]

Table S2. Noncovalent interactions between stereoisomers of triticonazole (TTZ) and soil enzymes. In parenthesis is given the number of the noncovalent interactions when it is higher than 1. For comparative reasons, this table also contains the noncovalent interactions between the investigated proteins and ligands that are present in their crystallographic structures. NADPH - dihydro-nicotinamide-adenine-dinucleotide phosphate, FBP - 1,6-di-O-phosphono-beta-D-fructofuranose, NAI - 1,4-dihydronicotinamide adenine dinucleotide, ISE- inositol, AMP - adenosine monophosphate.

| PDB ID          | ligand/<br>enantiomer | types of nocovalent interactions |                                                                                                                 |                | salt bridges         |
|-----------------|-----------------------|----------------------------------|-----------------------------------------------------------------------------------------------------------------|----------------|----------------------|
|                 |                       | Hydrophobic<br>interactions      | Hydrogen bonds                                                                                                  | $\pi$ stacking |                      |
| dehydrogenases  |                       |                                  |                                                                                                                 |                |                      |
| 1KEV<br>chain A | NADPH                 | VAL178                           | THR38 (2), SER39 (2),<br>ILE175 (2), ALA177,<br>VAL178, GLY179,<br>SER199, ARG200,<br>GLU247, ASN266,<br>TYR267 | -              | ARG200,<br>LYS340    |
|                 | (R)-TTZ               | VAL178                           | ARG200 (2), LYS340(2)                                                                                           | -              | -                    |
|                 | (S)-TTZ               | THR38, VAL178,<br>TYR267         | ARG200 (2), LYS340(3)                                                                                           | -              | -                    |
| 1KEV<br>chain B | NADPH                 | VAL178                           | ILE175, VAL178,<br>GLY179, SER199(2),<br>ARG200, TYR218,<br>GLY244, TYR267                                      | TYR218 (2)     | -                    |
|                 | (R)-TTZ               | ARG200                           | ARG200(2), LEU344                                                                                               | -              | -                    |
|                 | (S)-TTZ               | THR38, ARG200                    | ARG200(2)                                                                                                       | -              | -                    |
| 1KEV<br>chain C | NADPH                 | VAL178                           | THR38(2), SER39(3),<br>ILE175, VAL178,<br>SER199(2), ARG200,<br>GLY244, TYR267                                  | TYR218(2)      | ARG200(2),<br>LYS340 |
|                 | (R)-TTZ               | ILE173, VAL178,<br>TYR218(4)     | ILE175, SER199(2),<br>ARG200(2)                                                                                 | -              | -                    |
|                 | (S)-TTZ               | TYR218(3)                        | SER199(3), ARG200                                                                                               | -              | -                    |
| 1KEV<br>chain D | NADPH                 | VAL178                           | THR38(2), SER39(2),<br>HIS42, ILE175, VAL178,<br>SER199, ARG200(2),<br>TYR218, GLY244,<br>GLU247(2), TYR267     | TYR218(2)      | ARG200,<br>LYS340    |
|                 | (R)-TTZ               | ILE173, VAL197,<br>TYR218        | ILE175, GLY176,<br>SER199, ARG200(2)                                                                            | TYR218         | -                    |
|                 | (S)-TTZ               | TYR218                           | SER199(3), ARG200(2)                                                                                            | -              | -                    |
| 3AUT<br>chain A | NAI                   | PRO188                           | THR17, LEU19, VAL66,<br>GLY94, TYR158(2),<br>LYS162, MET191(2),<br>THR193, ASN196                               | -              | -                    |
|                 | (R)-TTZ               | LEU19, TYR39,<br>ILE195          | ASN92, TYR158,<br>LYS162                                                                                        | -              | -                    |
|                 | (S)-TTZ               | TYR39, ILE195                    | LEU19, ASN92(2),<br>TYR158, LYS162                                                                              | -              | -                    |

|                 |          |                                              |                                                                                                                        |        |                   |
|-----------------|----------|----------------------------------------------|------------------------------------------------------------------------------------------------------------------------|--------|-------------------|
| 3AUT<br>chain B | NAI      | PRO188                                       | THR17(2), LEU19,<br>ASP65, VAL66, GLY94,<br>TYR158(2), LYS162(2),<br>MET191(2), THR193,<br>ASN196                      | -      | -                 |
|                 | (R)-TTZ  | LEU19, PRO194,<br>ILE195                     | -                                                                                                                      | -      | -                 |
|                 | (S)-TTZ  | TYR39, VAL95                                 | ASN40                                                                                                                  | -      | -                 |
| 3NT5<br>chain A | ISE      | -                                            | LYS97, ARG127,<br>HIS155, ASN157,<br>HIS176(2)                                                                         | -      | -                 |
|                 | (R)-TTZ  | TYR164, ASP172,<br>TRP272                    | LYS97, HIS176                                                                                                          | -      | -                 |
|                 | (S)-TTZ  | TYR164, TYR235                               | LYS97(2)                                                                                                               | -      | -                 |
| 3NT5<br>chain B | ISE      | -                                            | LYS97, ARG127,<br>ASN157, HIS176                                                                                       | -      | -                 |
|                 | (R)-TTZ  | ASP172, TYR235,<br>TRP272(2)                 | GLY161, TRP272                                                                                                         | -      | -                 |
|                 | (S)-TTZ  | TYR164, TRP272                               | LYS97                                                                                                                  | -      | -                 |
| 5GTL<br>chain A | NADPH    | PRO166                                       | ASN168, GLU194(2),<br>GLN195, GLY224,<br>SER245(2), THR248(2),<br>GLU266, GYS300,<br>GLN347, GLU397(2)                 | -      | -                 |
|                 | (R)-TTZ  | It does not bind to the catalytic site       |                                                                                                                        |        |                   |
|                 | (S)-TTZ  | PRO166, TRP167,<br>PHE399(2)                 | GLU194, GLN195                                                                                                         | -      | -                 |
| 5GTL<br>chain B | NADPH    | PRO166, TRP167,<br>PHE399(2)                 | ASN168, GLU194,<br>GLN195, GLY224,<br>GLY244, SER245(3),<br>GLU266, CYS300,<br>GLN347, ARG350,<br>GLU397               |        | LYS191,<br>LYS346 |
|                 | (R)-TRIT | PRO166, ALA229,<br>PHE242, THR248,<br>TYR251 | ILE165, LYS191,<br>GLY224                                                                                              | -      | -                 |
|                 | (S)-TRIT | PHR399 (2)                                   | LYS191, GLN195                                                                                                         | -      | -                 |
| 5GTL<br>chain C | NADPH    | PRO166, TRP167                               | ASN168, GLU194(2),<br>GLN195, GLY224,<br>SER245(2), THR248(2),<br>TYR251, GLU266,<br>CYS300, GLN347,<br>GLU397, ILE398 | PHE399 | LYS191,<br>LYS346 |
|                 | (R)-TRIT | PRO166, TRP167,<br>PHE399                    | SER245, THR248,<br>LYS346, GLN347,<br>ARG350                                                                           | -      | -                 |
|                 | (S)-TRIT | PRO166, THR248,<br>TYR251                    | SER245, THR248,<br>LYS346, GLN347                                                                                      | -      | -                 |
| 5GTL<br>chain D | NADPH    | PRO166, PHE399                               | ASN168, GLU194,<br>GLN195, GLY224,<br>SER245(2), THR248,<br>GLU266, GLN347,<br>GLU397 (2)                              | -      | LYS191            |
|                 | (R)-TRIT | ALA194, PHE242,<br>PHE399                    | LYS191, GLN195                                                                                                         | PHE399 | -                 |

|                    |          |                                                                       |                                       |   |   |
|--------------------|----------|-----------------------------------------------------------------------|---------------------------------------|---|---|
|                    | (S)-TRIT | PRO166, PHE399                                                        | LYS191 (2), GLU194,<br>GLN195, GLY224 | - | - |
| <i>phosphatase</i> |          |                                                                       |                                       |   |   |
| 1H2F               | AMP      | ARG9 (2), ASN16,<br>ARG19 (2), ARG20,<br>GLN22 (2), GLY152,<br>MET176 | ARG19                                 | - | - |
|                    | (R)-TTZ  | TRP109, TYR175                                                        | ARG19, ARG98                          | - | - |
|                    | (S)-TTZ  | ASP101, PRO117                                                        | GLN118                                | - | - |
