# Supplementary material for: Assessment of the Effects of Triticonazole on Soil and Human Health
Source: Molecules. 2022 Oct 3;27(19):6554. doi: 10.3390/molecules27196554 (PMC9572687; doi:10.3390/molecules27196554)
Supplement: Supplementary file 1 [file molecules-27-06554-s001.zip]

Archive with 6 entries (6 files):
- Figure S1.pdf
- Figure S2.pdf
- Figure S3.pdf
- molecules-1892735-table S1.pdf
- Table S2-revised.pdf
- Table S3-revised.pdf
